# Supplementary material
Source: PubMed Central journal article supplement (PMC11029126)
Supplement: 262_2012_1242_MOESM1_ESM.pdf [file 262_2012_1242_MOESM1_ESM.pdf]

## Online resource 1

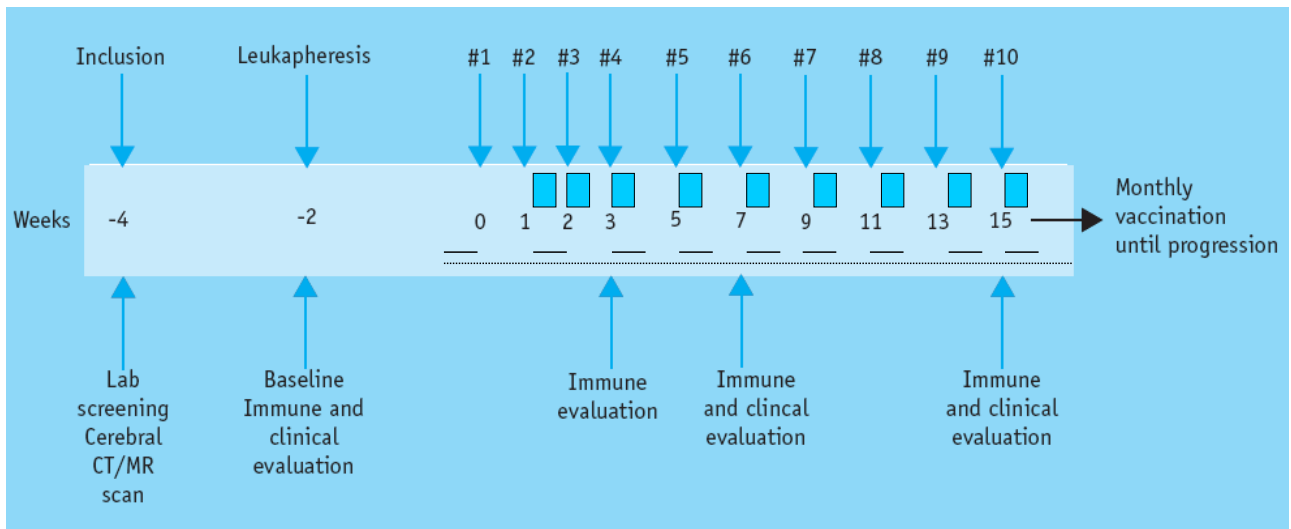

**Online resource 1:** The figure depicts the treatment schedule with time points for vaccination (# = vaccine number) and clinical and immune evaluation.

Concomitant treatment include: Cyclophosphamide (line) 50 mg twice a day every 2<sup>nd</sup> week, Celecoxib (dotted line) 200 mg daily and Interleukin-2 (squares), 2 MIU given as subcutaneous injections day 1-5 after each vaccination except the first.

Online resource 2

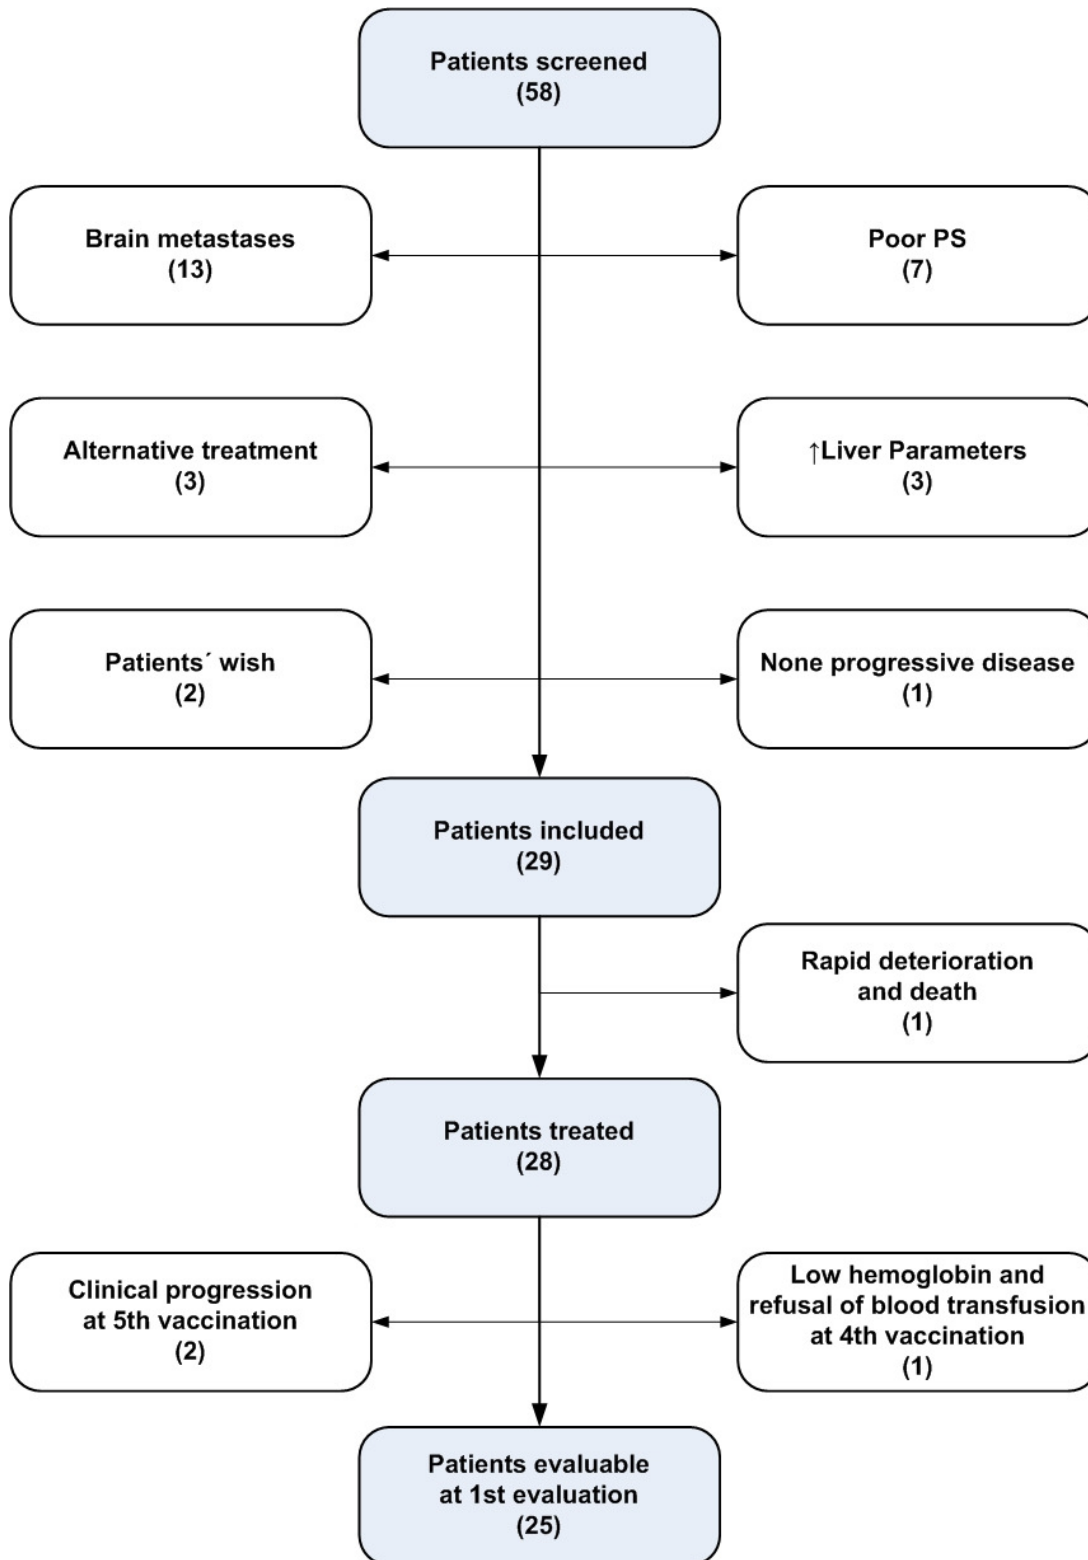

**Online resource 2:** Fifty-eight patients were screened for inclusion, 29 patients were included and 25 patients were fully evaluable. The flow diagram depicts the details. Numbers in brackets illustrate the number of patients. PS=Performance Status

### Online resource 3

| Patient no                          | Peptides / tumor lysate                                                                                                       |
|-------------------------------------|-------------------------------------------------------------------------------------------------------------------------------|
| 101,104,106,112,117,127,134,136,138 | allogeneic tumor lysate (melanoma cell lines VM 115, COLO 829, SK-MEL-28)                                                     |
| 102,116                             | autologous tumor lysate                                                                                                       |
| 103,126                             | sur(1M2, 9, 18-28, 6-14) hTert(p865, p540, p572, p30, p988, p672, p766) R9V, L9V, G11V, S9V, K9V, Y9L, Padre                  |
| 113,139                             | sur(1M2, 9, 18-28, 93-101, 47-56, 92-101) hTert(p865, p540, p572, p30, p988, p672, p766) R9V, L9V, G11V, S9V, K9V, Y9L, Padre |
| 118                                 | sur(1M2, 9, 18-28, 93-101, 47-56, 92-101) hTert(p865, p540, p572, p30, p988, p672), Padre                                     |
| 119                                 | sur(1M2, 9, 18-28, 18-27) hTert(p865, p540, p572, p30, p988, p672, p766) R9V, L9V, G11V, S9V, K9V, Y9L, Padre                 |
| 120                                 | sur(1M2, 9, 18-28) hTert(p865, p540, p572, p30, p988, p672, p766) R9V, L9V, G11V, S9V, K9V, Y9L, Padre                        |
| 121,128                             | sur(1M2, 9, 18-28, 6-14) hTert(p865, p540, p572, p30, p988, p672, p766) Padre                                                 |
| 123                                 | sur(1M2, 9, 18-28, 93-101, 47-56, 92-101) hTert(p865, p540, p572, p30, p988, p672) R9V, L9V, G11V, S9V, K9V, Y9L, Padre       |
| 125                                 | sur(1M2, 9, 18-28, 18-27, 6-14) hTert(p865, p540, p572, p30, p988, p973, p766) R9V, L9V, G11V, S9V, K9V, Y9L, Padre           |
| 129                                 | sur(1M2, 9, 18-28, 53-62) hTert(p865, p540, p572, p30, p988, p672, p766) R9V, L9V, G11V, S9V, K9V, Y9L, Padre                 |
| 130                                 | sur(1M2, 9, 18-28, 18-27, 6-14) hTert(p865, p540, p572, p30, p988, p672, p973, p766) Padre                                    |
| 131                                 | sur(1M2, 9, 18-28, 93-101, 47-56, 92-101) hTert(p865, p540, p572, p30, p988, p672, p766) Padre                                |
| 132                                 | sur(1M2, 9, 18-28) hTert(p865, p540, p572, p30, p988, p672, p766) Padre                                                       |
| 133                                 | sur(1M2, 9, 18-28, 18-27, 6-14) hTert(p865, p540, p572, p30, p988, p672, p766) Padre                                          |
| 135                                 | sur(1M2, 9, 18-28, 6-14) hTert(p865, p540, p572, p30, p988) R9V, L9V, G11V, S9V, K9V, Y9L, Padre                              |
| 140                                 | sur(1M2, 9, 18-28, 53-62, 6-14) hTert(p865, p540, p572, p30, p988, p672, p766) R9V, L9V, G11V, S9V, K9V, Y9L, Padre           |

**Online resource 3:** Patients received dendritic cells pulsed with tumor lysate or peptides according to their HLA type. The number of peptides depend on the HLA-type of the patient and whether the tumor did express p53 (primary or metastatic lesion tested for p53 expression with immunohistochemistry).
